# Supplementary material for: Survey of Paediatric Oncologists and Pathologists regarding Their Views and Experiences with Variant Translocations in Ewing and Ewing-Like Sarcoma: A Report of the Children’s Oncology Group
Source: Hindawi journal article supplement (doi:10.1155/2020/3498549), 2020-12-04
Supplement: f1 [file 3498549.f1.pdf]

## Supplementary Materials - Ewing Translocation Survey Results

**Q1: You are seeing a patient who presented with a mass in the right lower extremity. Biopsy was performed. Histology demonstrated a small round blue cell sarcoma and immunohistochemical staining showed diffuse CD99 positive staining. Molecular tests were performed and variant fusion transcripts were confirmed. With each of the following variants, how do you classify the case? (Please note EWSR1 = EWS in the following text.)**

*Answered: 141 Skipped: 2*

|                  | EWING SARCOMA | "EWING-LIKE" SARCOMA | NOT A EWING SARCOMA | UNSURE       | TOTAL |
|------------------|---------------|----------------------|---------------------|--------------|-------|
| EWSR1-FLI1       | 95.74%<br>135 | 0.00%<br>0           | 0.00%<br>0          | 4.26%<br>6   | 141   |
| EWSR1-ERG        | 78.83%<br>108 | 8.03%<br>11          | 0.73%<br>1          | 12.41%<br>17 | 137   |
| EWSR1-FEV        | 60.00%<br>81  | 13.33%<br>18         | 0.00%<br>0          | 26.67%<br>36 | 135   |
| EWSR1-ETV4(E1AF) | 60.45%<br>81  | 16.42%<br>22         | 0.75%<br>1          | 22.39%<br>30 | 134   |
| EWSR1-ETV1       | 61.19%<br>82  | 14.93%<br>20         | 0.75%<br>1          | 23.13%<br>31 | 134   |
| FUS-ERG          | 39.71%<br>54  | 15.44%<br>21         | 8.09%<br>11         | 36.76%<br>50 | 136   |
| FUS-FEV          | 36.84%<br>49  | 16.54%<br>22         | 7.52%<br>10         | 39.10%<br>52 | 133   |
| EWSR1-NFATC2     | 25.93%<br>35  | 27.41%<br>37         | 7.41%<br>10         | 39.26%<br>53 | 135   |
| EWSR1-SMARCA5    | 25.37%<br>34  | 26.87%<br>36         | 8.96%<br>12         | 38.81%<br>52 | 134   |
| EWSR1-SP3        | 20.15%<br>27  | 29.85%<br>40         | 8.21%<br>11         | 41.79%<br>56 | 134   |
| EWSR1-PATZ1(ZSG) | 22.56%<br>30  | 25.56%<br>34         | 8.27%<br>11         | 43.61%<br>58 | 133   |
| CIC-DUX4         | 0.74%<br>1    | 47.06%<br>64         | 27.21%<br>37        | 25.00%<br>34 | 136   |
| BCOR-CCNB3       | 0.75%<br>1    | 45.52%<br>61         | 24.63%<br>33        | 29.10%<br>39 | 134   |
| EWSR1-WT1        | 8.89%<br>12   | 11.85%<br>16         | 57.78%<br>78        | 21.48%<br>29 | 135   |

**Q2: Would patients with the following tumors get Ewing therapy?**

*Answered: 140 Skipped: 3*

|                                     | YES           | NO           | UNSURE       | TOTAL |
|-------------------------------------|---------------|--------------|--------------|-------|
| Ewing sarcoma                       | 99.29%<br>139 | 0.00%<br>0   | 0.71%<br>1   | 140   |
| Ewing-like sarcoma                  | 90.58%<br>125 | 1.45%<br>2   | 7.97%<br>11  | 138   |
| Desmoplastic small round cell tumor | 38.41%<br>53  | 39.13%<br>54 | 22.46%<br>31 | 138   |

## Supplementary Materials - Ewing Translocation Survey Results

### Q3: Would you consider the patient with each of the following fusions eligible for a Ewing sarcoma clinical trial?

Answered: 126 Skipped: 17

|                  | EWING TRIAL- PRIMARY ARM | EWING TRIAL- SEPARATE STRATA | EWING TRIAL- INELIGIBLE | UNSURE       | TOTAL |
|------------------|--------------------------|------------------------------|-------------------------|--------------|-------|
| EWSR1-FLI1       | 94.44%<br>119            | 0.00%<br>0                   | 0.00%<br>0              | 5.56%<br>7   | 126   |
| EWSR1-ERG        | 78.57%<br>99             | 5.56%<br>7                   | 0.00%<br>0              | 15.87%<br>20 | 126   |
| EWSR1-FEV        | 61.11%<br>77             | 10.32%<br>13                 | 0.00%<br>0              | 28.57%<br>36 | 126   |
| EWSR1-ETV4(E1AF) | 58.73%<br>74             | 11.11%<br>14                 | 0.00%<br>0              | 30.16%<br>38 | 126   |
| EWSR1-ETV1       | 62.40%<br>78             | 9.60%<br>12                  | 0.00%<br>0              | 28.00%<br>35 | 125   |
| FUS-ERG          | 34.40%<br>43             | 13.60%<br>17                 | 7.20%<br>9              | 44.80%<br>56 | 125   |
| FUS-FEV          | 32.80%<br>41             | 14.40%<br>18                 | 6.40%<br>8              | 46.40%<br>58 | 125   |
| EWSR1-NFATC2     | 24.19%<br>30             | 24.19%<br>30                 | 4.03%<br>5              | 47.58%<br>59 | 124   |
| EWSR1-SMARCA5    | 20.63%<br>26             | 26.19%<br>33                 | 4.76%<br>6              | 48.41%<br>61 | 126   |
| EWSR1-SP3        | 19.05%<br>24             | 23.81%<br>30                 | 5.56%<br>7              | 51.59%<br>65 | 126   |
| EWSR1-PATZ1(ZSG) | 20.97%<br>26             | 19.35%<br>24                 | 7.26%<br>9              | 52.42%<br>65 | 124   |
| CIC-DUX4         | 4.76%<br>6               | 40.48%<br>51                 | 20.63%<br>26            | 34.13%<br>43 | 126   |
| BCOR-CCNB3       | 4.00%<br>5               | 36.80%<br>46                 | 23.20%<br>29            | 36.00%<br>45 | 125   |
| EWSR1-WT1        | 5.60%<br>7               | 17.60%<br>22                 | 44.00%<br>55            | 32.80%<br>41 | 125   |

### Q4: Are break apart FISH tests for the following genes performed at your institution?

Answered: 121 Skipped: 22

|       | YES           | NO           | UNSURE       | TOTAL |
|-------|---------------|--------------|--------------|-------|
| EWSR1 | 82.64%<br>100 | 9.92%<br>12  | 7.44%<br>9   | 121   |
| FUS   | 36.67%<br>44  | 30.83%<br>37 | 32.50%<br>39 | 120   |
| CIC   | 16.53%<br>20  | 47.93%<br>58 | 35.54%<br>43 | 121   |
| BCOR  | 14.88%<br>18  | 49.59%<br>60 | 35.54%<br>43 | 121   |

## Supplementary Materials - Ewing Translocation Survey Results

**Q5: Please select the techniques for all tests that are currently performed at your institution to detect fusion gene status.**

*Answered: 114 Skipped: 29*

|                  | PERFORM TEST, UNSURE OF TECHNIQUE | PERFORM TWO COLOR FISH (FOR SPECIFIC FUSION) | PERFORM RT-PCR | PERFORM BOTH FISH AND RT-PCR | DO NOT PERFORM TEST | UNSURE OF WHETHER TEST IS PERFORMED OR NOT | TOTAL |
|------------------|-----------------------------------|----------------------------------------------|----------------|------------------------------|---------------------|--------------------------------------------|-------|
| EWSR1-FLI1       | 20.18%<br>23                      | 15.79%<br>18                                 | 7.02%<br>8     | 21.05%<br>24                 | 21.93%<br>25        | 14.04%<br>16                               | 114   |
| EWSR1-ERG        | 16.67%<br>19                      | 12.28%<br>14                                 | 9.65%<br>11    | 13.16%<br>15                 | 22.81%<br>26        | 25.44%<br>29                               | 114   |
| EWSR1-FEV        | 14.04%<br>16                      | 12.28%<br>14                                 | 3.51%<br>4     | 5.26%<br>6                   | 28.95%<br>33        | 35.96%<br>41                               | 114   |
| EWSR1-ETV4(E1AF) | 12.39%<br>14                      | 14.16%<br>16                                 | 1.77%<br>2     | 4.42%<br>5                   | 28.32%<br>32        | 38.94%<br>44                               | 113   |
| EWSR1-ETV1       | 12.39%<br>14                      | 14.16%<br>16                                 | 1.77%<br>2     | 5.31%<br>6                   | 28.32%<br>32        | 38.05%<br>43                               | 113   |
| EWSR1-NFATC2     | 9.73%<br>11                       | 7.96%<br>9                                   | 0.88%<br>1     | 3.54%<br>4                   | 31.86%<br>36        | 46.02%<br>52                               | 113   |
| EWSR1-SMARCA5    | 10.62%<br>12                      | 7.96%<br>9                                   | 0.88%<br>1     | 3.54%<br>4                   | 31.86%<br>36        | 45.13%<br>51                               | 113   |
| EWSR1-SP3        | 10.62%<br>12                      | 7.96%<br>9                                   | 0.88%<br>1     | 3.54%<br>4                   | 30.97%<br>35        | 46.02%<br>52                               | 113   |
| EWSR1-PATZ1      | 10.71%<br>12                      | 8.04%<br>9                                   | 0.89%<br>1     | 3.57%<br>4                   | 32.14%<br>36        | 44.64%<br>50                               | 112   |
| EWSR1-WT1        | 14.29%<br>16                      | 9.82%<br>11                                  | 3.57%<br>4     | 3.57%<br>4                   | 30.36%<br>34        | 38.39%<br>43                               | 112   |
| FUS-ERG          | 6.25%<br>7                        | 0.89%<br>1                                   | 3.57%<br>4     | 3.57%<br>4                   | 34.82%<br>39        | 50.89%<br>57                               | 112   |
| FUS-FEV          | 6.25%<br>7                        | 0.00%<br>0                                   | 3.57%<br>4     | 3.57%<br>4                   | 34.82%<br>39        | 51.79%<br>58                               | 112   |
| CIC-DUX4         | 6.14%<br>7                        | 2.63%<br>3                                   | 7.02%<br>8     | 2.63%<br>3                   | 42.11%<br>48        | 39.47%<br>45                               | 114   |
| BCOR-CCNB3       | 6.25%<br>7                        | 1.79%<br>2                                   | 7.14%<br>8     | 2.68%<br>3                   | 41.96%<br>47        | 40.18%<br>45                               | 112   |

**Q6: Would you consider it necessary to request FISH testing for translocations for the diagnosis of Ewing sarcoma?**

*Answered: 121 Skipped: 22*

|       | YES           | NO           | UNSURE       | TOTAL |
|-------|---------------|--------------|--------------|-------|
| EWSR1 | 82.64%<br>100 | 9.92%<br>12  | 7.44%<br>9   | 121   |
| FUS   | 36.67%<br>44  | 30.83%<br>37 | 32.50%<br>39 | 120   |
| CIC   | 16.53%<br>20  | 47.93%<br>58 | 35.54%<br>43 | 121   |
| BCOR  | 14.88%<br>18  | 49.59%<br>60 | 35.54%<br>43 | 121   |

## Supplementary Materials - Ewing Translocation Survey Results

### Q7: Would you consider it necessary to request further testing for specific fusion transcripts when EWSR1 break apart is confirmed by FISH?

Answered: 121 Skipped: 22

|                                                    | NECESSARY    | UNNECESSARY  | UNSURE       | TOTAL |
|----------------------------------------------------|--------------|--------------|--------------|-------|
| Typical Ewing sarcoma morphology, CD99 positive    | 29.75%<br>36 | 61.16%<br>74 | 9.09%<br>11  | 121   |
| Atypical Ewing sarcoma morphology or CD99 negative | 76.86%<br>93 | 12.40%<br>15 | 10.74%<br>13 | 121   |

### Q8: Would you consider it necessary to request further testing for specific fusion transcripts when EWSR1 break apart is negative or noninformative?

Answered: 121 Skipped: 22

|                                                    | NECESSARY     | UNNECESSARY | UNSURE       | TOTAL |
|----------------------------------------------------|---------------|-------------|--------------|-------|
| Typical Ewing sarcoma morphology, CD99 positive    | 80.17%<br>97  | 7.44%<br>9  | 12.40%<br>15 | 121   |
| Atypical Ewing sarcoma morphology or CD99 negative | 84.30%<br>102 | 4.13%<br>5  | 11.57%<br>14 | 121   |

### Q9: What is your discipline?

Answered: 121 Skipped: 22

| ANSWER CHOICES                                           | RESPONSES    |
|----------------------------------------------------------|--------------|
| Pediatric oncologist with special interest in sarcoma    | 42.15%<br>51 |
| Pediatric oncologist without special interest in sarcoma | 33.06%<br>40 |
| Surgical pathologist with special interest in sarcoma    | 16.53%<br>20 |
| Surgical pathologist without special interest in sarcoma | 0.83%<br>1   |
| Other (please specify)                                   | 7.44%<br>9   |
| TOTAL                                                    | 121          |

### Q10: Where do you currently practice medicine?

Answered: 121 Skipped: 22

| ANSWER CHOICES          | RESPONSES     |
|-------------------------|---------------|
| Africa                  | 0.00%<br>0    |
| Asia                    | 2.48%<br>3    |
| Australia & New Zealand | 1.65%<br>2    |
| Europe                  | 2.48%<br>3    |
| North America           | 93.39%<br>113 |
| South America           | 0.00%<br>0    |
| TOTAL                   | 121           |

## Supplementary Materials - Ewing Translocation Survey Results

### Q11: How many years are you from completion of medical training?

Answered: 121 Skipped: 22

| ANSWER CHOICES | RESPONSES |     |
|----------------|-----------|-----|
| 1 - 5 years    | 22.31%    | 27  |
| 6 - 10 years   | 29.75%    | 36  |
| 11 - 15 years  | 14.05%    | 17  |
| > 15 years     | 33.88%    | 41  |
| TOTAL          |           | 121 |

### Q12: What type of practice setting is your institution?

Answered: 121 Skipped: 22

| ANSWER CHOICES    | RESPONSES |     |
|-------------------|-----------|-----|
| Academic          | 90.08%    | 109 |
| Private/community | 9.92%     | 12  |
| TOTAL             |           | 121 |

### Q13: Approximately how many newly diagnosed bone and soft tissue sarcoma patients are treated at your institution each year?

Answered: 121 Skipped: 22

| ANSWER CHOICES | RESPONSES |     |
|----------------|-----------|-----|
| 0 - 10         | 29.75%    | 36  |
| 11-25          | 28.10%    | 34  |
| 26-50          | 16.53%    | 20  |
| 51-75          | 5.79%     | 7   |
| 76-100         | 1.65%     | 2   |
| > 100          | 18.18%    | 22  |
| TOTAL          |           | 121 |

### Q14: Approximately what percentage of your time is spent on basic/translational bench research?

| ANSWER CHOICES | RESPONSES |     |
|----------------|-----------|-----|
| 0              | 50.41%    | 61  |
| 1-20%          | 19.01%    | 23  |
| 21-40%         | 4.96%     | 6   |
| 41-60%         | 10.74%    | 13  |
| 61-80%         | 11.57%    | 14  |
| 81-100%        | 3.31%     | 4   |
| TOTAL          |           | 121 |
